# Supplementary material
Source: publisher figshare collection journal article supplement (https://sage.figshare.com/ndownloader/files/20186331)
Supplement: Supplementary file 1 [file 20186331]

**Supplementary Table 1:** Characteristics and Findings of Included Studies

| Author(s), Year,<br>Country              | Participants                            | Research aims                                                                                                                           | Design                                                                     | Brief synopsis of findings                                                                                                                                                                                                                                                                                       | Methods                                                          |
|------------------------------------------|-----------------------------------------|-----------------------------------------------------------------------------------------------------------------------------------------|----------------------------------------------------------------------------|------------------------------------------------------------------------------------------------------------------------------------------------------------------------------------------------------------------------------------------------------------------------------------------------------------------|------------------------------------------------------------------|
| Nilsson et al.,<br>2003<br><br>Sweden    | n=15<br>Aged 85-96<br>6 men<br>9 women  | To highlight the oldest<br>old people's view of<br>their future from the<br>perspective of<br>philosophy of life                        | Life story<br>interviews                                                   | <ul style="list-style-type: none"> <li>- Future seen as everyday life</li> <li>- Future-orientated values</li> <li>- Thoughts about life and death</li> <li>- Future experienced on three different levels:<br/>individual, intergenerational and metaphysical</li> <li>- Changed perspective of time</li> </ul> | Hermeneutic<br>Philosophy of life<br>framework<br>Jeffner (1988) |
| Hinck, 2004<br><br>North America         | n=19<br>Aged 85-98<br>6 men<br>13 women | To explore everyday<br>activities, concerns,<br>struggles and adaptive<br>strategies of older<br>people living alone in<br>a rural area | Multiple in-<br>depth interviews<br><br>Home tour<br><br>Photo elicitation | <ul style="list-style-type: none"> <li>- Independence at home is important</li> <li>- Creative adaptation strategies: changed<br/>environment, activities and patterns</li> <li>- Did not experience social isolation even though<br/>living alone in rural area</li> </ul>                                      | Interpretive<br>phenomenology                                    |
| Caldras &<br>Bertero, 2007<br><br>Brazil | n=16<br>Aged 85-88<br>6 men<br>10 women | To uncover the<br>essence of the lived<br>experience if being<br>very old in Brazil                                                     | Semi-structured<br>interviews                                              | <ul style="list-style-type: none"> <li>- Dissatisfaction with the present</li> <li>- Uncertain future</li> <li>- Self-respect and pride</li> <li>- Adaptation to ongoing life</li> </ul>                                                                                                                         | Hermeneutic                                                      |

| Author(s), Year, Country                | Participants                            | Research aims                                                                                         | Design               | Brief synopsis of findings                                                                                                                                                                                                                                                                                                          | Methods                                                                    |
|-----------------------------------------|-----------------------------------------|-------------------------------------------------------------------------------------------------------|----------------------|-------------------------------------------------------------------------------------------------------------------------------------------------------------------------------------------------------------------------------------------------------------------------------------------------------------------------------------|----------------------------------------------------------------------------|
| Hagglom-Kronlof et al., 2007<br>Finland | n=10<br>Aged 99<br>1 man<br>9 women     | To explore daily occupations                                                                          | Interviews           | <ul style="list-style-type: none"> <li>- Pride in daily occupations</li> <li>- Embracing challenge and learning new things</li> <li>- Patterns and rhythms of doing things</li> <li>- Sometimes feeling restricted or incapable</li> <li>- Adapted and reshaped sense of self</li> </ul>                                            | Phenomenographic<br>Marton (1994)<br>Alexandersson (1994)                  |
| Hovbrand et al., 2007<br>Sweden         | n=21<br>Aged 82-90<br>8 men<br>13 women | To describe how occupational performance outside the home is experienced by older people living alone | Interviews           | <ul style="list-style-type: none"> <li>- Dynamic relationship between person, environment and occupation</li> <li>- Keeping on doing</li> <li>- Drawing on available resources</li> <li>- Prioritizing meaningful occupations</li> <li>- Environment design can compensate for functional losses e.g. public benches</li> </ul>     | Phenomenography<br>Marton (1981)<br>Contextual analysis<br>Svensson (1997) |
| Nygren et al., 2007<br>Sweden           | n=18<br>Aged 85-90<br>7 men<br>11 women | To illuminate the meaning of inner strength                                                           | Narrative Interviews | <ul style="list-style-type: none"> <li>- Competent in oneself yet faith in others</li> <li>- Looking on bright side without hiding from dark (contemplating death)</li> <li>- Feeling eased but also being active</li> <li>- Being the same yet changing, adjusting</li> <li>- Connected to the past, present and future</li> </ul> | Hermeneutic<br>Ricoeur (1976)<br>Lindseth & Norberg (2004)                 |

| Author(s), Year, Country                         | Participants                            | Research aims                                                                                                 | Design                                        | Brief synopsis of findings                                                                                                                                                                                                                                                                                                            | Methods                                                    |
|--------------------------------------------------|-----------------------------------------|---------------------------------------------------------------------------------------------------------------|-----------------------------------------------|---------------------------------------------------------------------------------------------------------------------------------------------------------------------------------------------------------------------------------------------------------------------------------------------------------------------------------------|------------------------------------------------------------|
| Fischer et al., 2008<br>Sweden                   | n=15<br>Aged 85+<br>5 men<br>10 women   | To illuminate the meaning of the lived experience with respect to changes in later life                       | Thematic interviews                           | <ul style="list-style-type: none"> <li>- Embracing weakness and strength</li> <li>- Embracing slowness and swiftness</li> <li>- Embracing reconciliation and regret</li> <li>- Embracing connectedness and loneliness</li> <li>- Opposites, not finding equilibrium but accepting both change and continuity</li> </ul>               | Hermeneutic<br>Ricoeur (1976)<br>Lindseth & Norberg (2004) |
| Larsson et al., 2009<br>Sweden                   | n=18<br>Aged 85-93<br>8 men<br>10 women | To explore how the oldest old are living and managing on their own and to describe their everyday experiences | Semi-structured interviews<br><br>Observation | <ul style="list-style-type: none"> <li>- Do not feel valued in society</li> <li>- Would like to stay independent</li> <li>- Being occupied is important</li> <li>- Time perceived as significant</li> <li>- Not the things they do, but the way in which they do things has changed</li> </ul>                                        | Hermeneutic<br>Giorgi (1985)                               |
| Gudmannsdottir & Halldorsdottir, 2009<br>Iceland | n=12<br>Aged 74-97<br>7 men<br>5 women  | To get a better understanding of the lived experience of residents in chronic pain in nursing homes           | Open interviews, longitudinal                 | <ul style="list-style-type: none"> <li>- Primacy of existential pain and suffering</li> <li>- Culmination of losses e.g. loved ones, home, health and independence, connectedness</li> <li>- Some moving towards reconciliation, sources of strength in loved ones</li> <li>- Nurses in care facility perceived as distant</li> </ul> | Interpretive phenomenology<br>Halldorsdottir (2000)        |

| Author(s), Year, Country            | Participants                           | Research aims                                                                                                                      | Design                     | Brief synopsis of findings                                                                                                                                                                                                                                       | Methods                                                    |
|-------------------------------------|----------------------------------------|------------------------------------------------------------------------------------------------------------------------------------|----------------------------|------------------------------------------------------------------------------------------------------------------------------------------------------------------------------------------------------------------------------------------------------------------|------------------------------------------------------------|
| Smith, 2012<br>North America        | n=12<br>Aged 74-98<br>4 men<br>8 women | To explore how older people experience loneliness and how they cope                                                                | Semi-structured interviews | <ul style="list-style-type: none"> <li>- Loneliness is embodied as: fatigue, emptiness, tension and withdrawal</li> <li>- Multidimensional losses</li> <li>- Disrupted meaningful engagement due to age-related changes</li> </ul>                               | Interpretive phenomenology                                 |
| Ness et al., 2014<br>Norway         | n=12<br>Aged 82-94<br>12 men           | To illuminate the meaning of being an oldest old man living alone in a rural area and receiving home nursing care                  | Narrative interviews       | <ul style="list-style-type: none"> <li>- Feelings of insufficiency</li> <li>- Finding hope and reconciliation</li> <li>- Struggle between a dependent existence and a desire to be independent</li> <li>- Emotionally complex experiences/reflections</li> </ul> | Hermeneutic<br>Ricoeur (1976)<br>Lindseth & Norberg (2004) |
| Bergland & Slettebo, 2015<br>Norway | n=10<br>Aged 90-92<br>10 women         | To explore how older women who are living alone cope with the challenges of everyday life and how they create a sense of coherence | Semi-structured interviews | <p>Older women's health resources include:</p> <ul style="list-style-type: none"> <li>- Positive expectations</li> <li>- Reflection and adaptation</li> <li>- Function and active contribution</li> <li>- Relationships</li> <li>- Home</li> </ul>               | Hermeneutic<br>Salutogenic<br>Antonovsky (1979, 1987)      |

| Author(s), Year, Country                    | Participants                             | Research aims                                                                                                                | Design                                                    | Brief synopsis of findings                                                                                                                                                                                                | Methods                                                             |
|---------------------------------------------|------------------------------------------|------------------------------------------------------------------------------------------------------------------------------|-----------------------------------------------------------|---------------------------------------------------------------------------------------------------------------------------------------------------------------------------------------------------------------------------|---------------------------------------------------------------------|
| Clancy et al., 2015<br>Norway               | n=6<br>Aged 75-98<br>3 men<br>3 women    | To identify how older people in nursing care perceive falls, falling and fall prevention                                     | Semi-structured interviews<br>Observation                 | - Did not want to dwell on subject of falls, preferring to discuss past memories<br>- Distanced self from the causes of their fall<br>- Notable differences between experiences of women and men                          | Hermeneutic<br>van Manen (1997)<br>Heidegger & Levinas              |
| Pusztai, 2015<br>America                    | n=13<br>Aged 87-100<br>5 men<br>8 women  | To explore lived experiences, particularly in regard to loss and grief                                                       | Semi-structured interviews<br>Field notes<br>Observations | - Parallel losses and gains, negative and positive<br>- Acknowledgement that change toward decline is inevitable<br>- Balancing and adapting to changes                                                                   | Hermeneutic                                                         |
| van Wijngaarden et al., 2015<br>Netherlands | n=25<br>Aged 70-99<br>11 men<br>14 women | To describe the phenomenon of feeling that 'life is completed and no longer worth living' without terminal or mental illness | In-depth interviews                                       | - Both an inability and an unwillingness to connect with their lives<br>- Aching loneliness<br>- Pain of not mattering<br>- Inability to express oneself<br>- Multidimensional tiredness<br>- Aversion towards dependence | Reflective<br>Lifeworld<br>Phenomenology<br>Dahlberg et al., (2008) |

| Author(s), Year, Country           | Participants                              | Research aims                                                                                                         | Design                     | Brief synopsis of findings                                                                                                                                                                                                                                                                        | Methods                                                    |
|------------------------------------|-------------------------------------------|-----------------------------------------------------------------------------------------------------------------------|----------------------------|---------------------------------------------------------------------------------------------------------------------------------------------------------------------------------------------------------------------------------------------------------------------------------------------------|------------------------------------------------------------|
| Saarnio et al., 2017<br>Sweden     | n=20<br>Aged 85-101<br>10 men<br>10 women | To illuminate meanings of 'at-homeness' in people with severe illness                                                 | Narrative interviews       | <ul style="list-style-type: none"> <li>- Time and place are interwoven</li> <li>- At-homeness relies on familiarity and sense of belonging with others</li> <li>- Balance between past, present and future</li> <li>- Acceptance and reorientation</li> </ul>                                     | Hermeneutic<br>Ricoeur (1981)<br>Lindseth & Norberg (2004) |
| Sjoberg et al., 2017<br>Sweden     | n=23<br>Aged 76-101<br>12 men<br>11 women | To illuminate meanings of existential loneliness by older people in long-term care                                    | Narrative interviews       | <ul style="list-style-type: none"> <li>- Being trapped in a failing body</li> <li>- Being met with indifference</li> <li>- Having nobody to share life with</li> <li>- Lacking purpose and meaning</li> <li>- Sense of worthlessness</li> </ul>                                                   | Hermeneutic<br>Ricoeur (1976)<br>Lindseth & Norberg (2004) |
| Bruun-Olsen et al., 2018<br>Norway | n=8<br>Aged 69-91<br>2 men<br>6 women     | To explore how elderly patients with a hip fracture have experienced their recovery process (4 months after fracture) | Semi-structured interviews | <ul style="list-style-type: none"> <li>- Vulnerability, subservience, hopelessness</li> <li>- Tension between self-reliance and dependence on others</li> <li>- Disruption from 'normal' life</li> <li>- Loss of mobility and independence</li> <li>- Impact of age profoundly present</li> </ul> | Hermeneutic<br>Giorgi (1985)<br>Malterud (2012)            |
| Pardo et al., 2018<br>Italy        | n=14<br>Aged 76-96<br>2 men<br>12 women   | To explore how is old age experienced by older people attending a social day centre                                   | In-depth interviews        | <ul style="list-style-type: none"> <li>- Changes and limitations related to old age</li> <li>- The experience that comes from having lived a long life, strength-based</li> <li>- An awareness of death</li> </ul>                                                                                | Hermeneutic<br>Ricoeur (1976)<br>Lindseth & Norberg (2004) |
